# Supplementary material
Source: MDPI journal article supplement (https://www.mdpi.com/2073-4441/14/1/74)
Supplement: s1 [file s1]

Supplementary Materials

# Spatiotemporal Change Analysis of Soil Moisture Based on Downscaling Technology in Africa

Zijin Yuan <sup>1,†</sup>, Nusseiba NourEldeen <sup>2,3,†</sup>, Kebiao Mao <sup>2,4,5,\*</sup>, Zhihao Qin <sup>2</sup> and Tongren Xu <sup>5</sup>

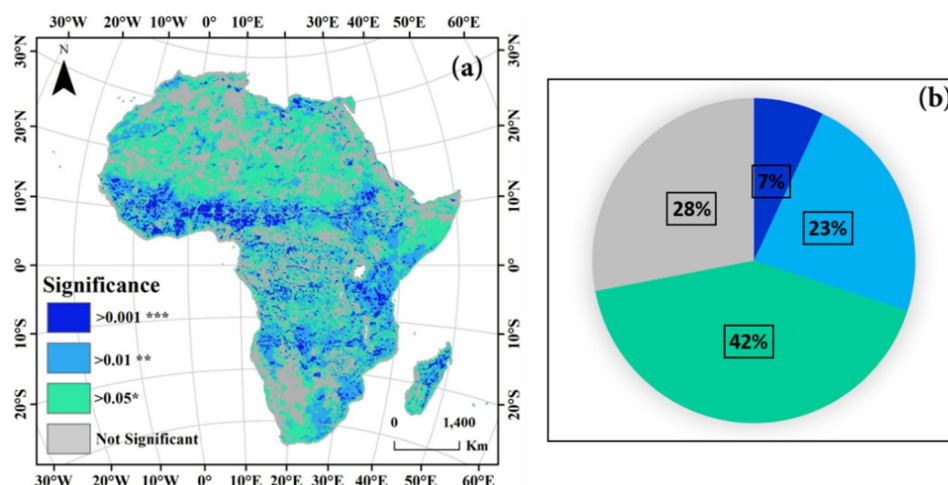

**Figure S1.** The spatial distribution of the annual soil moisture significance and area percentage (%) trends in Africa from 2003 to 2017. (\*\*\*, \*\*, \* Significant at the  $P = 0.001$ ,  $0.01$  and  $0.05$  confidence levels, respectively).

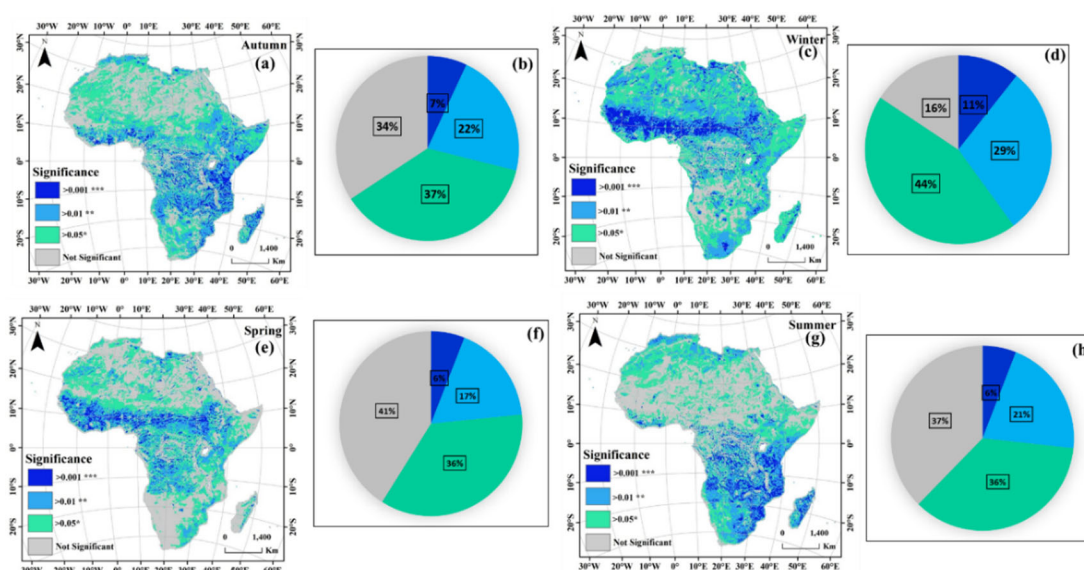

**Figure S2.** Significance of the spatial distribution of seasonal soil moisture trends with area percentage (%) from 2003 to 2017. (\*\*\*, \*\*, \* Significant at the  $P = 0.001$ ,  $0.01$  and  $0.05$  confidence levels, respectively).

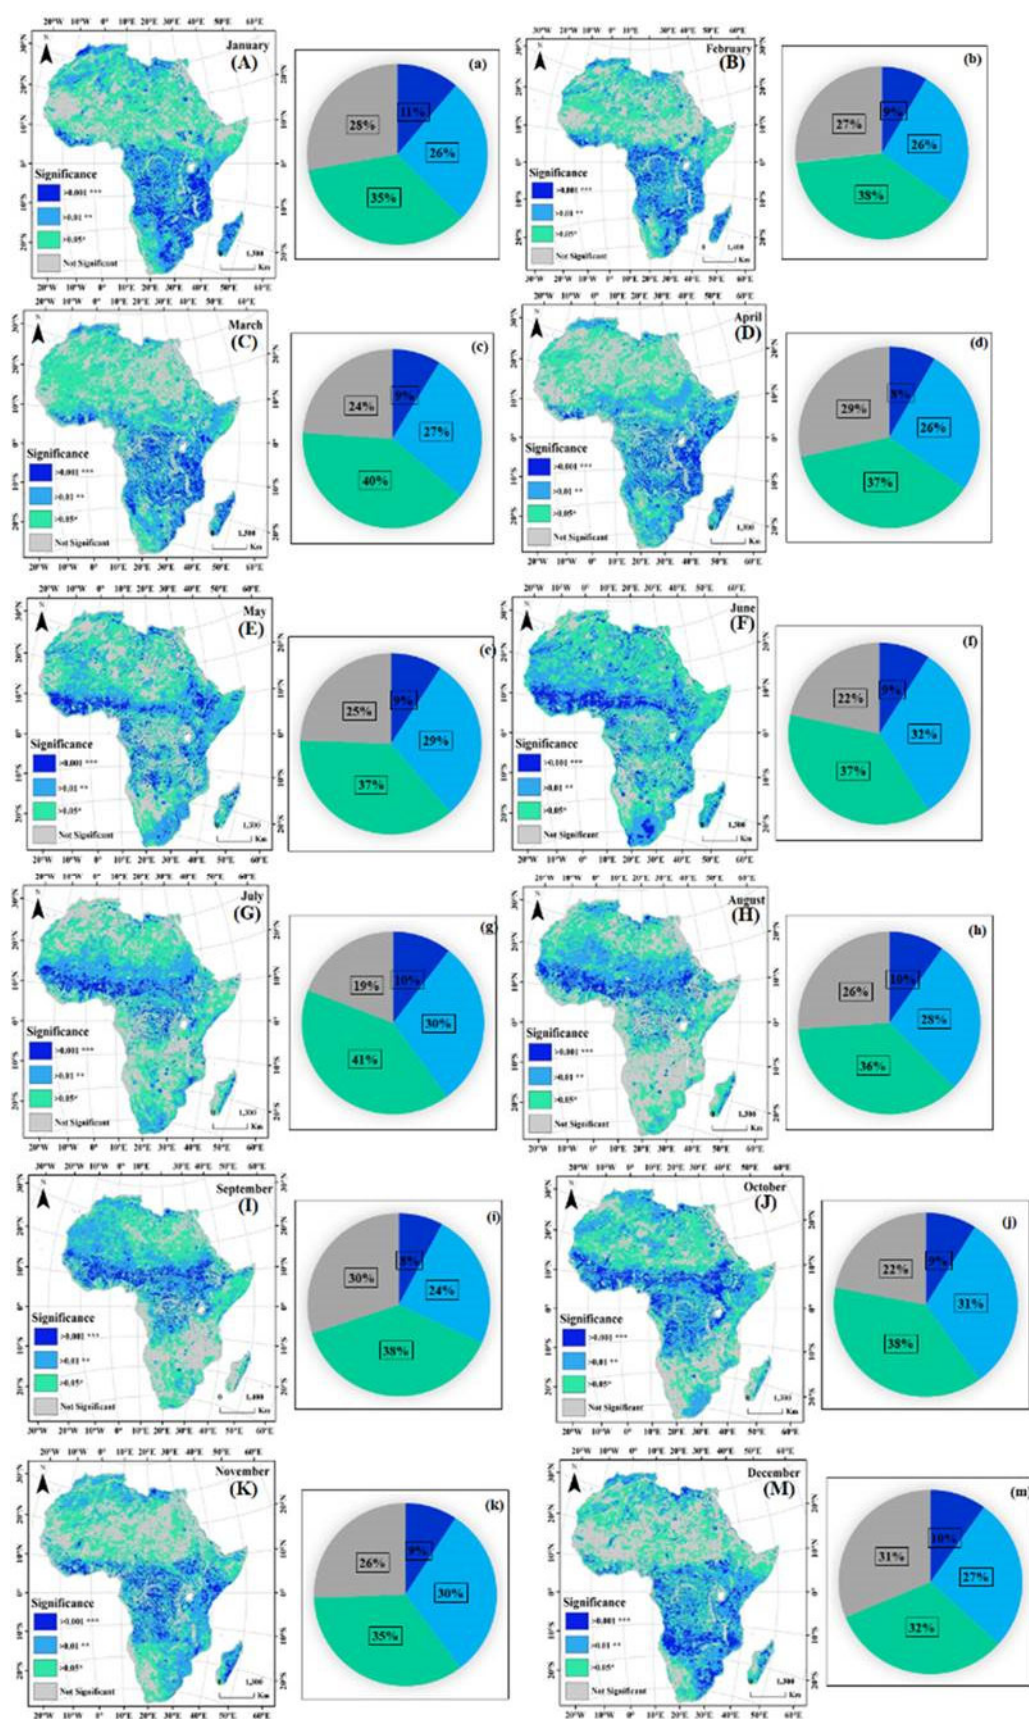

**Figure S3.** Significance and area percentage (%) of the spatial distribution of monthly soil moisture trends in Africa from 2003 to 2017. (\*\*\*, \*\*, \* Significant at the  $P=0.001$ ,  $0.01$  and  $0.05$  confidence levels, respectively).
